# Supplementary material for: Phosphorus-based ligand effects on the structure and radical scavenging ability of molecular nanoparticles of CeO2
Source: Royal Society of Chemistry journal article supplement (doi:10.1039/d1dt02667d), 2021-01-01
Supplement: d1dt02667d1.pdf [file d1dt02667d1.pdf]

## Electronic Supplementary Information

### Phosphorus-based Ligand Effects on the Structure and Radical Scavenging Ability of Molecular Nanoparticles of CeO<sub>2</sub>

Bradley Russell-Webster,<sup>a</sup> Javi Lopez-Nieto,<sup>a</sup> Khalil A. Abboud<sup>a</sup> and George Christou<sup>\*a</sup>

*Department of Chemistry, University of Florida, Gainesville, FL 32611-7200, USA.*

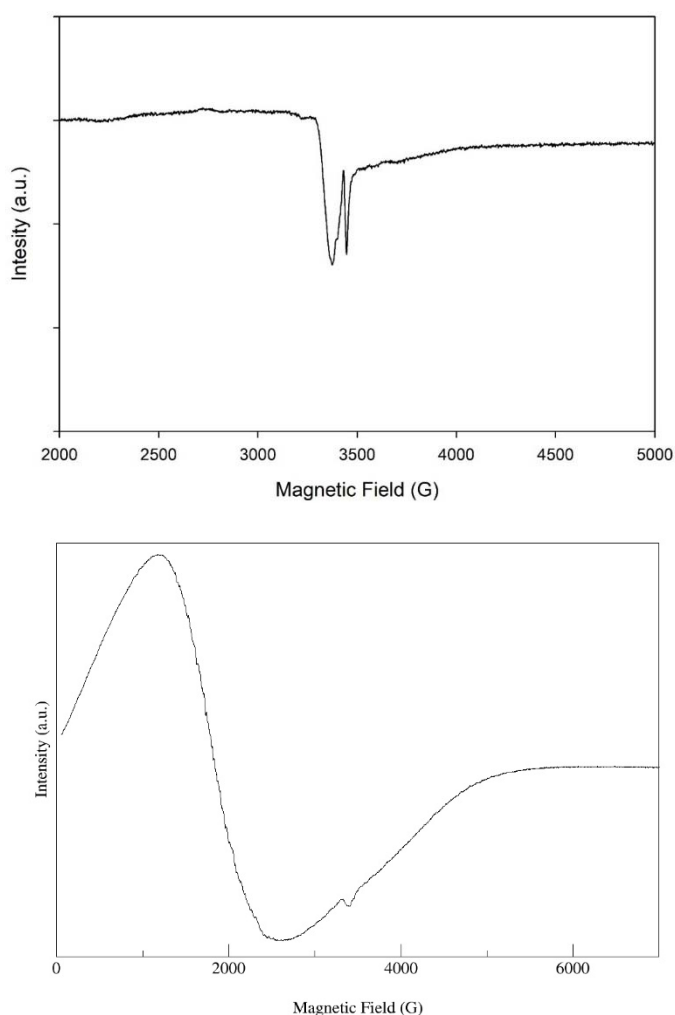

**Figure S1.** (top) The X-band electron paramagnetic resonance (EPR) spectrum of a microcrystalline powder of  $2 \cdot 2py \cdot 2H_2O$  at 5.0 K. The only peak observed is a Cu impurity in the resonator at approx 3500 G, indicating that there are no unpaired electrons from Ce<sup>III</sup> present in the complex. (bottom) EPR spectrum of cluster Ce<sub>24a</sub> as a microcrystalline powder at 5.0 K. The Cu impurity present in the resonator is the weak signal at ~3500 G.

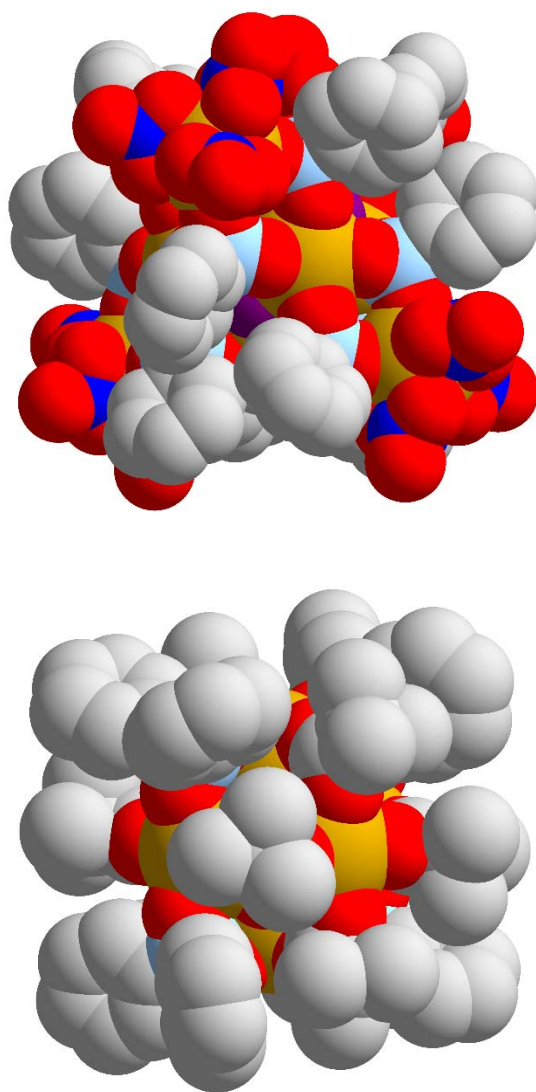

**Figure S2.** The structures of the anion of **1** (top) and **2** (bottom) in space-filling mode, showing that access by hydroxyl radicals to the surface is not prevented and thus cannot be the explanation for the poor radical scavenging ability of these complexes. Color code: Ce<sup>IV</sup> gold, O red, OH purple, N dark blue, P light blue and C grey. H atoms have been omitted for clarity.
